# Supplementary material for: BaTiO3/MXene/PVDF-TrFE composite films via an electrospinning method for flexible piezoelectric pressure sensors
Source: Royal Society of Chemistry journal article supplement (doi:10.1039/d2tc05291a), 2023-01-01
Supplement: d2tc05291a1.pdf [file d2tc05291a1.pdf]

## Supplementary Information

### BaTiO<sub>3</sub>/MXene/PVDF-TrFE composite film via electrospinning method for flexible piezoelectric pressure sensor

Xingmin Liu <sup>a,1,\*</sup>, Jinling Tong <sup>a,1</sup>, Jijie Wang <sup>a,\*</sup>, Shaowei Lu <sup>a,\*</sup>, Dongxu Yang <sup>a</sup>, Hongmei Li <sup>a</sup>, Chunzhong Liu <sup>a</sup>, Yutong Song <sup>a</sup>

<sup>a</sup>College of Material Science and Engineering, Shenyang Aerospace University, Shenyang 110136, China

<sup>1</sup>These authors contributed equally to this work and should be considered co-first authors.

\*Corresponding authors. E-mail: xmliusy@163.com (Xingmin Liu)

E-mail: 2495188358@qq.com (Jijie Wang)

E-mail: Lushaowei\_2005@163.com (Shaowei Lu)

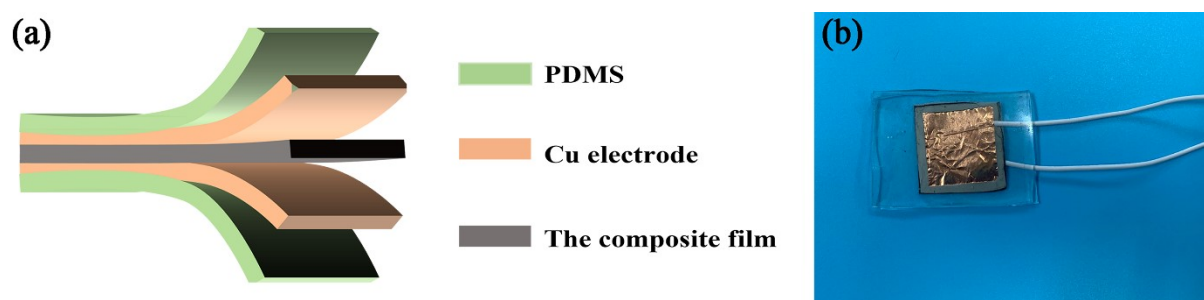

Fig. S1 (a) The schematic structural diagram and (b) the optical diagram of the pressure sensor.

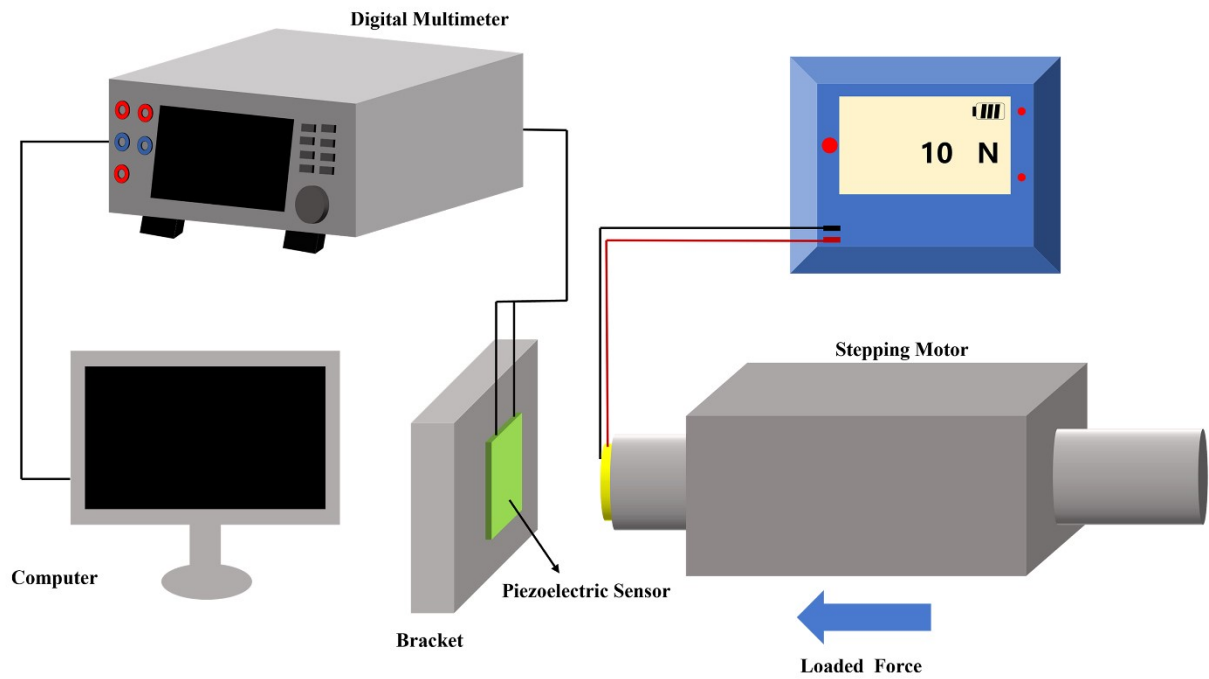

**Fig. S2** The piezoelectric testing system was self-made in the laboratory.

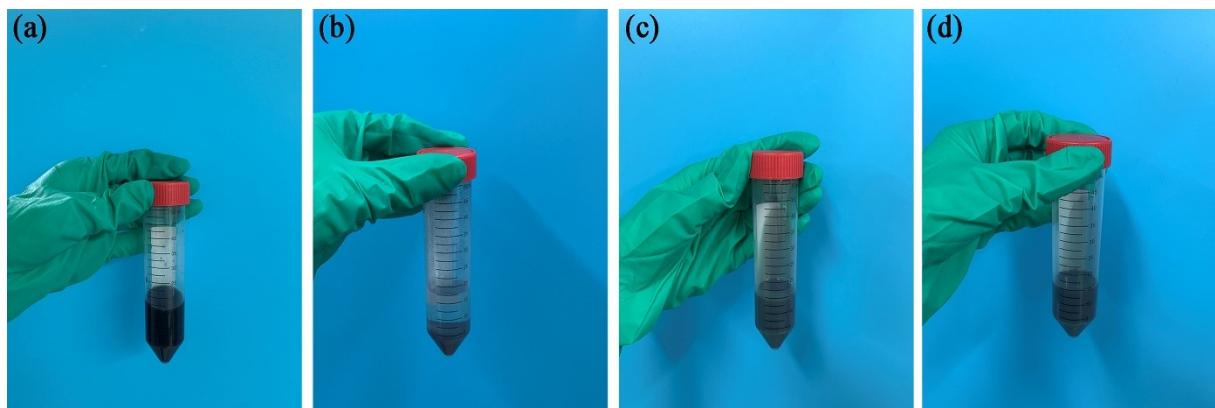

**Fig. S3** Digital photos of (a) the MXene solution, (b) the BaTiO<sub>3</sub>/MXene flocculent precipitate, (c) the BaTiO<sub>3</sub>/MXene /PVDF-TrFE suspension and d the BaTiO<sub>3</sub>/MXene /PVDF-TrFE suspension and after standing for 24h.

**Table S1** The DSC data and crystallinity  $X_c$  and relative content of  $\beta$  phases  $F(\beta)$  of the composite films.

| Sample  | $\Delta H_f$ (J/g) | $X_c$ (%) | $F(\beta)$ (%) |
|---------|--------------------|-----------|----------------|
| MX-0    | 16.40              | 39.49     | 75.12          |
| MX-0.05 | 17.65              | 42.10     | 75.19          |
| MX-0.1  | 18.68              | 44.82     | 79.57          |
| MX-0.15 | 21.03              | 50.31     | 81.04          |
| MX-0.2  | 13.94              | 33.15     | 66.13          |
| MX-0.25 | 13.22              | 31.34     | 61.44          |

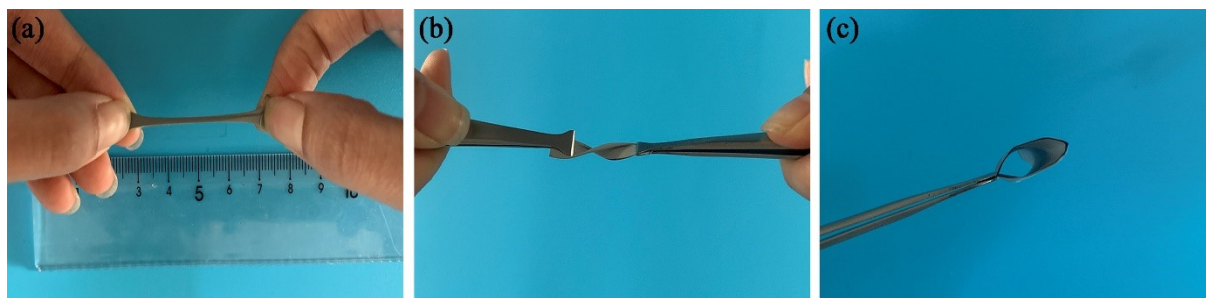

**Fig. S4** Optical images of the composite film subjected to (a) stretching, (b) twisting and (c) bending.

**Table S2.** Summary of the recently reported piezoelectric pressure sensors.

| Materials                           | Processing technology | Output voltage(V) | Range (KPa) | Response time (ms) | Reference |
|-------------------------------------|-----------------------|-------------------|-------------|--------------------|-----------|
| BaTiO <sub>3</sub> @PMMA/PVDF-TrFE  | electrospinning       | 12.6              | -           | 41                 | 1         |
| BaTiO <sub>3</sub> @C/PVDF          | SLS                   | 5.7               | -           | -                  | 2         |
| BaTiO <sub>3</sub> @rGO/PVDF        | NFEDW                 | -                 | 0.489-1.926 | 130                | 3         |
| PVDF                                | spin coating          | 0.6               | 1-25 N      | 507                | 4         |
| BaTiO <sub>3</sub> /PDMS            | spin coating          | 2.5               | 1-25 N      | 193                | 4         |
| BaTiO <sub>3</sub> @PDA/PVDF        | spin coating          | 9.3               | 12-250 N    | 61                 | 5         |
| SWCNTS/PVDF                         | NFEDW                 | -                 | 1.3-3.1     | 66                 | 6         |
| BaTiO <sub>3</sub> /ZnO/PVDF        | electrospinning       | 12                | 0.25-1.6    | -                  | 7         |
| MXene/PVDF-TrFE                     | spin coating          | -                 | 0.072-3.083 | 16                 | 8         |
| BaTiO <sub>3</sub> /PVDF-TrFE       | electrospinning       | 50                | 0.01-0.2 N  | -                  | 9         |
| BaTiO <sub>3</sub> /PVDF-TrFE       | Solvent casting       | 50.1              | 10-100 N    | -                  | 10        |
| BaTiO <sub>3</sub> /MXene/PVDF-TrFE | electrospinning       | 7.6               | 0.2-400     | 56                 | This work |

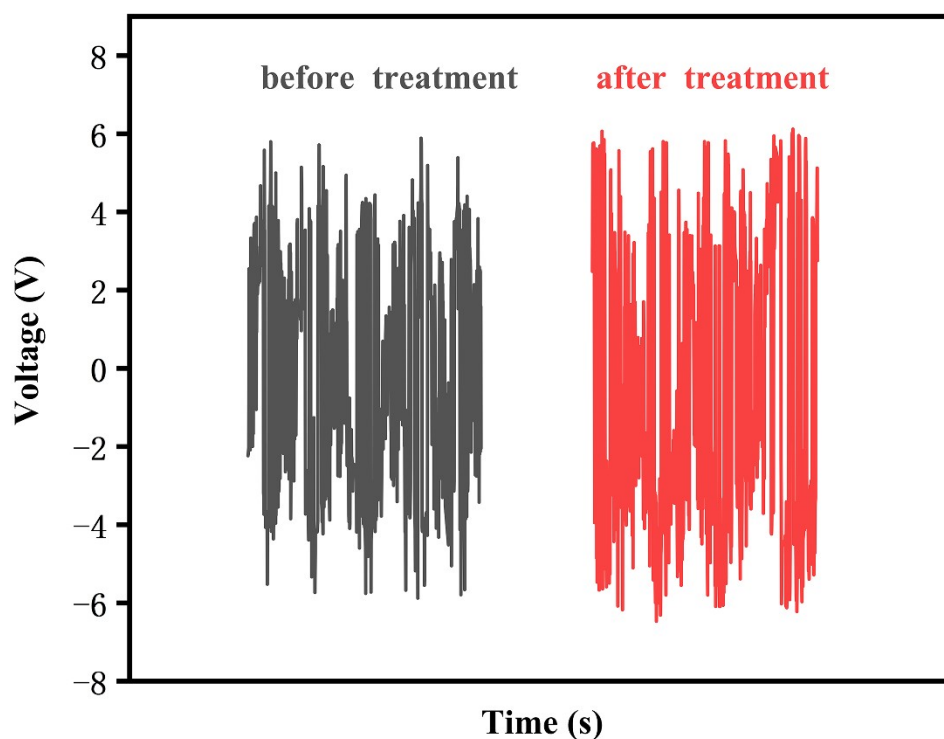

**Fig. S5** Changes in voltage value of BaTiO<sub>3</sub>/MXene-0.15/PVDF-TrFE pressure sensor before and after immersion in 0.25wt% NaCl solution.

## References

- [1] K. Shi, B. Chai, H. Zou, P. Shen, B. Sun, P. Jiang, Z. Shi, and X. Huang, *Nano Energy*, 2021, **80**, 105515.
- [2] F. Qi, Z. Zeng, J. Yao, W. Cai, Z. Zhao, S. Peng, and C. Shuai, *Materials Science and Engineering: C*, 2021, **126**, 112129.
- [3] J. Luo, L. Zhang, T. Wu, H. Song, C. Tang, F. Huang, and C. Zuo, *Organic Electronics*, 2021, **98**, 106296.
- [4] D. Park, K. Kim, *Korean Journal of Metals and Materials*, 2021, **59**, 412-421.
- [5] Y. Yang, H. Pan, G. Xie, Y. Jiang, C. Chen, Y. Su, Y. Wang, and H. Tai, *Sensors and Actuators A: Physical*, 2019, 111789.
- [6] J. Luo, L. Zhang, T. Wu, H. Song, and C. Tang, *Extreme Mechanics Letters*, 2021, **48**, 101279.
- [7] A. Hussein, R. Sabry, *Polymer Testing*, 2019, **79**, 0142-9418.
- [8] L. Li, X. Fu, S. Chen, S. Uzun, A. Levitt, C. Shuck, and Y. Gogotsi, *ACS Applied Materials & Interfaces*, 2020, **13**, 15362-15369.
- [9] J. Jiang, S. Tu, R. Fu, J. Li, F. Hu, B. Yan, Y. Gu, and S. Chen, *ACS Applied Materials & Interfaces*, 2020, **12**, 33989-33998.
- [10] Y. Cho, J. Jeong, M. Choi, G. Baek, S. Park, H. Choi, and J. J. Park, *Chemical Engineering Journal*, 2022, **427**, 1385-8947.
